# Supplementary material for: Diagnosis and Treatment of Invasive Aspergillosis Caused by Non-fumigatus Aspergillus spp
Source: MDPI journal article supplement (doi:10.3390/jof9040500), 2023-04-21
Supplement: s1 [file s1]

## **Supplementary File**

**Table S1. Search Algorithms for PubMed Search.**

| <b>No.</b> | <b>Search algorithm</b>                                                                                                                                                                                                                                                                                                                            |
|------------|----------------------------------------------------------------------------------------------------------------------------------------------------------------------------------------------------------------------------------------------------------------------------------------------------------------------------------------------------|
| 1          | ("non-fumigatus"[MeSH Terms] OR "non-fumigatus"[All Fields] OR ("non-fumigatus"[All Fields] AND "diagnosis"[All Fields]) OR "non-fumigatus"[All Fields]) AND (invasive[All Fields] AND ("aspergillosis"[MeSH Terms] OR "aspergillosis"[All Fields]))                                                                                               |
| 2          | ("Aspergillus flavus"[MeSH Terms] OR "Aspergillus flavus"[All Fields] OR ("Aspergillus flavus"[All Fields] AND "diagnosis"[All Fields]) OR "Aspergillus flavus"[All Fields] AND "treatment"[All Fields] OR "Aspergillus flavus"[All Fields]) AND (invasive[All Fields] AND ("aspergillosis"[MeSH Terms] OR "aspergillosis"[All Fields]))           |
| 3          | ("Aspergillus nidulans"[MeSH Terms] OR "Aspergillus nidulans"[All Fields] OR ("Aspergillus nidulans"[All Fields] AND "diagnosis"[All Fields]) OR "Aspergillus nidulans"[All Fields] AND "treatment"[All Fields] OR "Aspergillus nidulans"[All Fields]) AND (invasive[All Fields] AND ("aspergillosis"[MeSH Terms] OR "aspergillosis"[All Fields])) |
| 4          | ("Aspergillus niger"[MeSH Terms] OR "Aspergillus niger"[All Fields] OR ("Aspergillus niger"[All Fields] AND "diagnosis"[All Fields]) OR "Aspergillus niger"[All Fields] AND "treatment"[All Fields] OR "Aspergillus niger"[All Fields]) AND (invasive[All Fields] AND ("aspergillosis"[MeSH Terms] OR "aspergillosis"[All Fields]))                |
| 5          | ("Aspergillus terreus"[MeSH Terms] OR "Aspergillus terreus"[All Fields] OR ("Aspergillus terreus"[All Fields] AND "diagnosis"[All Fields]) OR "Aspergillus terreus"[All Fields] AND "treatment"[All Fields] OR "Aspergillus terreus"[All Fields]) AND (invasive[All Fields] AND ("aspergillosis"[MeSH Terms] OR "aspergillosis"[All Fields]))      |

Search performed between September 2022 and December 2022.
